# Supplementary material for: Dual-specificity phosphatase 3 deletion promotes obesity, non-alcoholic steatohepatitis and hepatocellular carcinoma
Source: PubMed Central journal article supplement (PMC7954796; doi:10.1038/s41598-021-85089-6), 2021-03-12

**Dual-Specificity Phosphatase 3 deletion promotes obesity, non-alcoholic steatohepatitis and hepatocellular carcinoma**

Sophie Jacques, Arash Arjomand, H  l  ne Per  e, Patrick Collins, Alice Mayer, Arnaud Lavergne, Marie W  ry, Myriam Mni, Alexandre Hego, Virginie Thuillier, Guillaume Beckers, Mohamed Ali Bahri, Alain Plenevaux, Emmanuel Di Valentin, C  cile Oury, Michel Moutschen, Philippe Delvenne, Nicolas Paquot, Souad Rahmouni

**Supplementary material**

## Supplementary material and methods

### Antibodies

**Supplementary table S1.** Antibodies for immunoblot analysis.

| Target                                                                                      | Reference  | Firm           |
|---------------------------------------------------------------------------------------------|------------|----------------|
| DUSP3                                                                                       | 8889       | Santacruz      |
| Phospho-p44/42 MAPK (ERK1/2)<br>(Thr202/Tyr204)                                             | 9101       | Cell Signaling |
| P44/42 MAPK (ERK1/2)                                                                        | 9102       | Cell Signaling |
| Phosphor-Akt (Ser473)                                                                       | 9271       | Cell Signaling |
| Akt                                                                                         | 9272       | Cell Signaling |
| Phospho-IGF-1 Receptor $\beta$<br>(Tyr1135/1136)/Insulin Receptor $\beta$<br>(Tyr1150/1151) | 3024       | Cell Signaling |
| Insulin Receptor $\beta$ (4B8)                                                              | 3025       | Cell Signaling |
| Phospho-GSK-3 $\alpha/\beta$ (Ser21/9)                                                      | 9331       | Cell Signaling |
| GSK-3 $\alpha/\beta$                                                                        | 7291       | Santacruz      |
| Phospho-p38 MAPK (Thr180/Tyr182)                                                            | 9215       | Cell Signaling |
| P38 MAPK                                                                                    | 9212       | Cell Signaling |
| Actin                                                                                       | SAB5500001 | Sigma-Aldrich  |

## qRT-PCR

2µg of liver total RNA were reverse-transcribed to obtain cDNA (RevertAid H Minus First Strand cDNA Synthesis Kit, ThermoFisher Scientific, Waltham, Massachusetts, United States). Each cDNA was analyzed, in triplicate, with the ABsolute Blue QPCR Mix, SYBR Green, ROX (ThermoFisher Scientific, Waltham, Massachusetts, United States) in the CFX384 Touch Real-Time PCR Detection System (BioRad, Nazareth, Belgium) The results were normalized to Ribosomal Protein S9 (RPS9). The relative mRNA expression levels were calculated using the  $2^{-\Delta C_t}$  method. Used primers are presented in Supplementary Table 2 (IDT, Coralville, Iowa, United States).

### Supplementary table S2. Primers used for qRT-PCR.

| Gene   | FW                     | RV                    |
|--------|------------------------|-----------------------|
| DUSP3  | GGGTGATGCCAGTTTCT      | GATCTCAACGACCTGCTCTC  |
| DUSP4  | CACGGACATCTGCCTGCTTAAA | GGCCAGGGCCTTGGTTT     |
| DUSP9  | AGAAGGCTACCCAGCATACTA  | GCACTGGGCTAGACATTGAG  |
| DUSP12 | TCTCTTGTGAGCAAAGGCTATT | CTTCGCTGTTGACCCAACTA  |
| DUSP26 | TAACCATGCTGACGAAGTCTG  | TTGAGCACGTGGGTGATG    |
| FASN   | TGGCTGTGTATTCCAGTTGTAG | CTCAAGATGAAGGTGGCAGAG |
| PNPLA3 | TCTCACTCACCAGGGTGTC    | GGGAATGAAGCAGGAACACA  |
| SREBF1 | CATGCCCTCCATAGACACATC  | AGAAGCTCAAGCAGGAGAAC  |
| IRS2   | GTCCAGGCACTGGAGCTTT    | GCTGGTAGCGCTTCACTCTT  |
| LEPR   | GACTTGCAGATGGTCACCCA   | TGGGCTCAGACGTAGGATGA  |
| GCK    | CAACTGGACCAAGGGCTTCAA  | TGTGGCCACCGTGTCAATC   |
| RPS9   | CACGGAGACCCTTCGAGA     | GTAACTTGACCCTCCAAACCT |

## RNA-sequencing and analysis

Total RNA was extracted from 20mg of frozen liver using the Maxwell® 16 LEV simplyRNA Tissue Kit (Promega, Madison, Wisconsin, United States), according to manufacturer's instruction. RNA quantity was assessed using a spectrophotometer (NanoDrop Technologies, Wilmington, Delaware, United States). Total RNA integrity was evaluated by QIAxcel Advanced technology (Qiagen, Hilden, Germany). RNA libraries were prepared using Truseq stranded mRNA sample prep kit from Illumina (San Diego, California, United States), based on polyA selection of mRNA. cDNAs fragments were sequenced using the Illumina NextSeq500 (San Diego, California, United States). . Biological triplicates were performed for all the conditions.

Raw reads were quality controlled using FastQC (version 0.11.5) and aligned to the Ensembl mouse reference genome GRCm38 (release 97) using STAR (version 7.1a)(1). Gene expression quantification was obtained with the --quantMode GeneCounts STAR option. Normalization and differential expression analysis were performed using the DESeq2 R package(2), with the apeglm method for effect size shrinkage(3). Genes with a q value below 0.05 and a fold change above 1.5 were considered differentially expressed. Heatmaps and fold change plots were performed using ggplot2 R package.

For GSEA analysis of RNA-sequencing data, GSEA software available on the GSEA-Broad Institute website was used. Mouse Ensembl gene identifiers were converted to human orthologues. Normalized gene expression data set was run against a library of 50 curated gene sets for hallmark pathways (MSigDB v7.1). The statistical significance (False Discovery Rate (FDR) q-value) was estimated by running 1000 gene set permutations.

### **MicroCT imaging**

Body composition of CD and HFD fed DUSP-3 KO and WT mice was assessed by X-ray computed tomography (CT) imaging. CT scans were acquired using an eXplore 120 micro-CT (Gamma Medica, USA/GE Healthcare, UK) with a customized protocol (70 kV, 0.512 mAs, 360 views over 360°, continuous rotation) provided by the manufacturer (4):(5). Mice were anesthetized with isoflurane. Respiratory rate and body temperature were continuously monitored during the procedure. All micro-CT images were reconstructed using the Feldkamp's filtered back-projection algorithm with a cutoff at the Nyquist frequency to obtain a 3D volume with an isotropic voxel size of 100  $\mu\text{m}$ . To assess adipose tissue CT signal intensity, CT scans of different freshly harvested fat types (epididymal white fat, subcutaneous white fat, adrenal white fat and brown fat) were acquired.

Fat and lean volumes were assessed by semi-automated segmentation procedure using PMOD 3.6 software (PMOD Technologies, Zurich, Switzerland; RRID:SCR\_016547). Briefly, an intensity threshold range (-280 to -160 HU (Hounsfield unit)) for fat was obtained based on the images of the ex-vivo harvested fat. In-vivo CT image of the whole mouse was sent to the PMOD automated segmentation to extract the fat part. Based on the mean signal intensity (threshold for bone: 250 HU), extracted on a spherical region of interest placed on the bone, binary mask of the bone was extracted using automated segmentation method implemented in PMOD. A total body mask was also generated using a range of signal intensities containing fat, bone, and muscle. Knowing the voxel size and the number of voxels in the obtained masks, the fat, bone and total body volumes were calculated.

The % of Fat mass was calculated as follow:

$$\% \text{ Fat mass} = \text{Fat Volume} * 100 / \text{Total Body Volume}$$

% Lean and bone mass= [Total Body Volume – Fat Volume] \*100/ Total Body  
Volume

## Supplementary results

**Supplementary table S3.** Differentially expressed genes between WT and DUSP3-KO mice under CD.

| Gene name      | Base Mean | log2 Fold Change | lfcSE    | pvalue   | padj     |
|----------------|-----------|------------------|----------|----------|----------|
| BC018473       | 61,08668  | 8,681199         | 2,623081 | 1,43E-10 | 9,47E-08 |
| Gm28438        | 10,46834  | 5,403573         | 1,343156 | 2,83E-06 | 0,000464 |
| AC121973.1     | 1066,416  | 3,894238         | 0,541599 | 3,05E-14 | 6,35E-11 |
| Slc13a4        | 16,96862  | 3,442846         | 1,191334 | 0,00019  | 0,012367 |
| Slc22a29       | 51,80212  | 2,608627         | 0,570525 | 2,21E-07 | 5,56E-05 |
| Tnfai3l3       | 16,59083  | 2,528087         | 0,833577 | 0,000185 | 0,012165 |
| Sult2a7        | 497,7114  | 2,485481         | 1,026678 | 0,000384 | 0,019494 |
| Gck            | 2650,667  | 2,353243         | 0,391146 | 7,79E-11 | 5,59E-08 |
| Lrtm1          | 122,5058  | 2,283397         | 0,810075 | 0,000144 | 0,010095 |
| Tsku           | 1731,861  | 2,224796         | 0,501571 | 3,69E-07 | 8,53E-05 |
| Gprc5b         | 127,992   | 2,149273         | 0,657558 | 3,75E-05 | 0,003624 |
| Adgrv1         | 430,7787  | 2,100606         | 0,548934 | 4,93E-06 | 0,000733 |
| Gm36041        | 199,7098  | 1,993876         | 0,67525  | 0,000102 | 0,007779 |
| Fam25c         | 599,7406  | 1,960855         | 0,617637 | 5,14E-05 | 0,004602 |
| A530020G20 Rik | 44,81259  | 1,958284         | 0,787831 | 0,000405 | 0,020118 |
| Aatk           | 220,9329  | 1,932801         | 0,304295 | 1,04E-11 | 1,08E-08 |
| B430212C06 Rik | 69,20869  | 1,843239         | 0,704276 | 0,000275 | 0,015813 |
| Cxcl1          | 350,9636  | 1,770165         | 0,647952 | 0,000197 | 0,012596 |
| Slc22a27       | 159,6481  | 1,742171         | 0,753385 | 0,000569 | 0,024624 |
| Twist1         | 10,58552  | 1,731414         | 0,832107 | 0,001461 | 0,04746  |
| Angptl8        | 1912,465  | 1,698778         | 0,448251 | 5,9E-06  | 0,00082  |
| Gm45941        | 23,62497  | 1,666457         | 0,601722 | 0,000222 | 0,013733 |
| Saa3           | 498,2451  | 1,512821         | 0,605867 | 0,000383 | 0,019494 |
| Adora1         | 667,4911  | 1,509423         | 0,285775 | 6,06E-09 | 2,76E-06 |
| Tsc22d1        | 1585,504  | 1,413191         | 0,305869 | 1,89E-07 | 5,01E-05 |
| Fcor           | 69,87633  | 1,407807         | 0,584358 | 0,000498 | 0,022603 |
| Leap2          | 4474,507  | 1,394632         | 0,606791 | 0,000603 | 0,025561 |
| Eda2r          | 36,15298  | 1,375382         | 0,588245 | 0,000625 | 0,026175 |
| Gm3219         | 28,94414  | 1,363962         | 0,4177   | 4,81E-05 | 0,00438  |
| Gm11967        | 60,64426  | 1,360183         | 0,507707 | 0,000263 | 0,015435 |
| Ppp1r3c        | 1673,915  | 1,334909         | 0,330506 | 2,41E-06 | 0,000413 |
| S1pr1          | 1022,217  | 1,322611         | 0,271081 | 5,07E-08 | 1,68E-05 |
| Mapk4          | 34,48571  | 1,317896         | 0,45069  | 0,000137 | 0,009854 |

|                   |          |          |          |          |          |
|-------------------|----------|----------|----------|----------|----------|
| 2510016D11<br>Rik | 26,63388 | 1,303332 | 0,520078 | 0,000429 | 0,020902 |
| Man2c1os          | 28,50406 | 1,2732   | 0,550417 | 0,00068  | 0,027914 |
| 9030619P08<br>Rik | 207,0271 | 1,269385 | 0,374795 | 2,88E-05 | 0,002957 |
| Wdfy1             | 442,6566 | 1,252201 | 0,191888 | 3,45E-12 | 5,04E-09 |
| Bcl7c             | 234,3844 | 1,241851 | 0,219432 | 7,65E-10 | 4,59E-07 |
| Syt3              | 109,0069 | 1,239582 | 0,337453 | 1,04E-05 | 0,001277 |
| Nim1k             | 44,60683 | 1,231837 | 0,500392 | 0,00047  | 0,022038 |
| Extl1             | 194,7231 | 1,192456 | 0,56434  | 0,000999 | 0,036333 |
| Lgals1            | 1103,921 | 1,120122 | 0,438019 | 0,000356 | 0,018902 |
| Orai1             | 222,7327 | 1,108715 | 0,245639 | 3,17E-07 | 7,85E-05 |
| Brca2             | 55,57081 | 1,099428 | 0,371942 | 0,000129 | 0,00941  |
| Acot11            | 192,8185 | 1,094551 | 0,376872 | 0,000145 | 0,010095 |
| Cry1              | 153,1225 | 1,086219 | 0,307373 | 1,82E-05 | 0,002013 |
| Wdr91             | 432,0544 | 1,067826 | 0,220585 | 6,79E-08 | 2,11E-05 |
| Snai2             | 98,18259 | 1,05691  | 0,293287 | 1,47E-05 | 0,001721 |
| Sipa1l2           | 91,54609 | 0,992331 | 0,382032 | 0,00036  | 0,018928 |
| Lin9              | 55,96553 | 0,989077 | 0,414051 | 0,000624 | 0,026175 |
| Saa4              | 3989,58  | 0,988811 | 0,445849 | 0,00095  | 0,035337 |
| Cebpe             | 134,7867 | 0,981576 | 0,410319 | 0,000602 | 0,025561 |
| Ubt1              | 168,209  | 0,954629 | 0,298716 | 6,26E-05 | 0,005437 |
| Ccdc85c           | 328,1395 | 0,931646 | 0,147417 | 1,54E-11 | 1,5E-08  |
| Zfp385a           | 335,7378 | 0,930775 | 0,248858 | 8,99E-06 | 0,001152 |
| Myorg             | 693,8881 | 0,927971 | 0,244246 | 7,42E-06 | 0,000975 |
| Cyp2j9            | 397,3673 | 0,913251 | 0,312523 | 0,00015  | 0,010287 |
| Abcb9             | 56,33894 | 0,913154 | 0,350179 | 0,000382 | 0,019494 |
| Tjp3              | 364,5132 | 0,910429 | 0,297388 | 0,0001   | 0,007722 |
| Pdzrn3            | 81,3333  | 0,905305 | 0,424037 | 0,001126 | 0,039484 |
| F830016B08<br>Rik | 156,2251 | 0,901901 | 0,455235 | 0,00151  | 0,048509 |
| Pigyl             | 347,1542 | 0,881351 | 0,351087 | 0,000484 | 0,02232  |
| Herc3             | 163,3345 | 0,878096 | 0,270027 | 5,37E-05 | 0,004773 |
| Slc6a9            | 873,1387 | 0,874546 | 0,298612 | 0,00015  | 0,010299 |
| Gm42604           | 62,30693 | 0,869012 | 0,357272 | 0,000592 | 0,025328 |
| Shf               | 224,9846 | 0,866603 | 0,233086 | 1,03E-05 | 0,001277 |
| Ahr               | 891,7482 | 0,862652 | 0,186264 | 2,02E-07 | 5,26E-05 |
| D630039A03<br>Rik | 237,8987 | 0,853386 | 0,332007 | 0,000414 | 0,02035  |
| Col5a3            | 1030,653 | 0,84714  | 0,280764 | 0,000119 | 0,008773 |
| D930048N14<br>Rik | 180,4646 | 0,840365 | 0,353716 | 0,000681 | 0,027914 |
| Prxl2b            | 302,3913 | 0,837226 | 0,353002 | 0,000708 | 0,028431 |
| A230050P20<br>Rik | 2141,484 | 0,828651 | 0,282941 | 0,000168 | 0,011291 |
| Tert              | 101,2178 | 0,807315 | 0,374865 | 0,001169 | 0,04046  |



|                   |          |          |          |          |          |
|-------------------|----------|----------|----------|----------|----------|
| Nup93             | 147,2572 | 0,803338 | 0,313092 | 0,000437 | 0,021122 |
| Rcc2              | 764,6012 | 0,797514 | 0,184873 | 9,32E-07 | 0,000184 |
| Glud1             | 20936,96 | 0,797253 | 0,246293 | 6,04E-05 | 0,00531  |
| 1810058l24Ri<br>k | 2271,99  | 0,794508 | 0,19637  | 2,9E-06  | 0,00047  |
| Pgp               | 422,1214 | 0,788707 | 0,159699 | 5,36E-08 | 1,7E-05  |
| Inhbc             | 1798,292 | 0,78491  | 0,250351 | 8,37E-05 | 0,006859 |
| Stk38l            | 360,2986 | 0,7709   | 0,259559 | 0,000145 | 0,010095 |
| Mid1ip1           | 773,1517 | 0,768517 | 0,286013 | 0,000326 | 0,017759 |
| Wdr6              | 425,1099 | 0,768061 | 0,196553 | 5,52E-06 | 0,000796 |
| Rps6ka1           | 377,2825 | 0,76782  | 0,20726  | 1,15E-05 | 0,00137  |
| Gm15446           | 60,78648 | 0,766327 | 0,330095 | 0,000841 | 0,032528 |
| Bax               | 503,319  | 0,759068 | 0,172704 | 6,61E-07 | 0,00014  |
| Tle3              | 403,3288 | 0,75709  | 0,272432 | 0,000254 | 0,015019 |
| Gm12909           | 276,3702 | 0,75334  | 0,34944  | 0,001217 | 0,041455 |
| Atp23             | 83,51953 | 0,752598 | 0,348285 | 0,001194 | 0,040966 |
| Chd9              | 337,7558 | 0,752394 | 0,184244 | 2,58E-06 | 0,000438 |
| Asap3             | 201,3774 | 0,752386 | 0,277546 | 0,000312 | 0,017377 |
| Aars2             | 276,7543 | 0,744104 | 0,200334 | 1,13E-05 | 0,001368 |
| Rtn4rl1           | 417,5824 | 0,740634 | 0,280426 | 0,000385 | 0,019494 |
| Dock4             | 497,4657 | 0,736862 | 0,216345 | 3,58E-05 | 0,003483 |
| Ssx2ip            | 196,8453 | 0,731867 | 0,220971 | 5,01E-05 | 0,004536 |
| Gpr135            | 67,06414 | 0,728081 | 0,322648 | 0,001019 | 0,036884 |
| Cited2            | 306,059  | 0,727096 | 0,266346 | 0,000304 | 0,017054 |
| Aox3              | 6062,398 | 0,718071 | 0,341568 | 0,001414 | 0,046339 |
| Ldlrad3           | 123,9164 | 0,717327 | 0,298422 | 0,000719 | 0,028647 |
| Ttc7              | 989,8676 | 0,715343 | 0,208972 | 3,44E-05 | 0,00339  |
| Slc25a23          | 3268,101 | 0,70706  | 0,311911 | 0,001003 | 0,036394 |
| Rpusd3            | 255,2211 | 0,703633 | 0,240025 | 0,000175 | 0,011725 |
| Tmc6              | 314,1529 | 0,702302 | 0,284414 | 0,000624 | 0,026175 |
| Plip              | 404,744  | 0,699165 | 0,185791 | 1,01E-05 | 0,001264 |
| Ptprf             | 2273,344 | 0,691463 | 0,193314 | 2,04E-05 | 0,002201 |
| Kifc2             | 169,6803 | 0,690805 | 0,306641 | 0,00106  | 0,037596 |
| Pnkd              | 1871,871 | 0,690659 | 0,280974 | 0,000689 | 0,028064 |
| Gsap              | 657,8006 | 0,685217 | 0,242193 | 0,000245 | 0,014664 |
| Mug2              | 7439,878 | 0,685105 | 0,264845 | 0,00048  | 0,02232  |
| Slc36a1           | 595,9387 | 0,682509 | 0,210528 | 6,71E-05 | 0,005759 |
| Fbxw9             | 879,5844 | 0,681367 | 0,245178 | 0,000281 | 0,016074 |
| Gpsm2             | 308,2671 | 0,680085 | 0,173467 | 5,47E-06 | 0,000796 |
| Pias3             | 220,5459 | 0,674491 | 0,199559 | 4,24E-05 | 0,004044 |
| Cars              | 618,0213 | 0,673058 | 0,257433 | 0,000446 | 0,021164 |
| Polr2i            | 561,5536 | 0,671855 | 0,262443 | 0,000517 | 0,02305  |
| Lrrc42            | 572,5879 | 0,66709  | 0,225289 | 0,000167 | 0,011291 |
| Atp13a2           | 307,7564 | 0,658681 | 0,293038 | 0,00112  | 0,039373 |
| Igsf8             | 211,0695 | 0,645859 | 0,290439 | 0,001153 | 0,040143 |

|                   |          |          |          |          |          |
|-------------------|----------|----------|----------|----------|----------|
| Dusp28            | 211,8871 | 0,640692 | 0,231335 | 0,000307 | 0,017152 |
| Svil              | 412,1398 | 0,640403 | 0,294218 | 0,001339 | 0,044802 |
| Tsen54            | 176,5685 | 0,63977  | 0,226922 | 0,000268 | 0,015556 |
| Slc9a6            | 409,7318 | 0,636858 | 0,225914 | 0,000269 | 0,015556 |
| Rasl11b           | 61,97577 | 0,634773 | 0,279671 | 0,001144 | 0,040008 |
| Nectin1           | 1235,408 | 0,630397 | 0,227812 | 0,000343 | 0,018396 |
| Rxrg              | 160,3029 | 0,628702 | 0,272628 | 0,00105  | 0,03736  |
| Pold2             | 164,8219 | 0,625812 | 0,21925  | 0,000244 | 0,014625 |
| Rpp21             | 195,4837 | 0,608352 | 0,235234 | 0,000535 | 0,023663 |
| Tcea3             | 1122,757 | 0,607874 | 0,228995 | 0,000445 | 0,021164 |
| Klhl22            | 357,2525 | 0,606998 | 0,156199 | 6,99E-06 | 0,000935 |
| Dop1b             | 653,1866 | 0,606645 | 0,241904 | 0,000651 | 0,027057 |
| Celsr1            | 271,3317 | 0,602876 | 0,264909 | 0,00115  | 0,04013  |
| Fgfr4             | 988,1454 | 0,600057 | 0,190177 | 0,000101 | 0,007726 |
| 4933439C10<br>Rik | 161,4305 | 0,593134 | 0,214065 | 0,000333 | 0,018042 |
| Fuk               | 189,1037 | 0,591084 | 0,249289 | 0,000941 | 0,035142 |
| Acbd4             | 1221,292 | 0,588261 | 0,249092 | 0,00098  | 0,036167 |
| Prkcz             | 324,8077 | -0,58157 | 0,209225 | 0,000326 | 0,017759 |
| Zfp750            | 238,1661 | -0,58441 | 0,259419 | 0,001238 | 0,042072 |
| Gtf2b             | 535,8008 | -0,58718 | 0,186398 | 0,000104 | 0,007894 |
| Tec               | 543,9289 | -0,58732 | 0,162144 | 1,97E-05 | 0,002164 |
| Hnrnpa1           | 1342,822 | -0,58936 | 0,199119 | 0,000186 | 0,012193 |
| Tbrg1             | 1237,256 | -0,58952 | 0,207952 | 0,00027  | 0,015556 |
| Sri               | 846,9037 | -0,59061 | 0,174776 | 4,66E-05 | 0,004316 |
| Chp1              | 7157,596 | -0,59341 | 0,1948   | 0,00014  | 0,009976 |
| Krt18             | 5352,656 | -0,59584 | 0,273482 | 0,001429 | 0,046711 |
| Dlst              | 5247,41  | -0,5983  | 0,131507 | 4,02E-07 | 9,15E-05 |
| Rbm4b             | 403,5569 | -0,60511 | 0,243991 | 0,000691 | 0,028088 |
| Usp1              | 506,4438 | -0,60606 | 0,195642 | 0,000115 | 0,008567 |
| Tnfaip8l1         | 941,1454 | -0,60789 | 0,263447 | 0,001048 | 0,03736  |
| Gpt2              | 15174,01 | -0,61095 | 0,226925 | 0,000389 | 0,019608 |
| Daglb             | 749,7578 | -0,61352 | 0,202937 | 0,000152 | 0,010382 |
| Hps4              | 293,235  | -0,61422 | 0,204433 | 0,000156 | 0,010591 |
| Pdlim1            | 484,3492 | -0,61737 | 0,237472 | 0,000508 | 0,022973 |
| Rpl3              | 5245,907 | -0,62044 | 0,276147 | 0,001171 | 0,04046  |
| Trib1             | 1334,42  | -0,63301 | 0,259806 | 0,00071  | 0,028434 |
| Tmed4             | 2362,873 | -0,63353 | 0,115572 | 2,99E-09 | 1,56E-06 |
| Rbpms             | 1096,41  | -0,63416 | 0,263915 | 0,000793 | 0,031103 |
| Fam169b           | 512,9445 | -0,65755 | 0,254453 | 0,000482 | 0,02232  |
| Hspd1             | 6138,804 | -0,65866 | 0,155921 | 1,78E-06 | 0,000321 |
| Mafk              | 331,1919 | -0,66223 | 0,305654 | 0,001304 | 0,04381  |
| Acox1             | 61105,58 | -0,6668  | 0,211186 | 8,7E-05  | 0,007013 |
| Pnpla7            | 5475,373 | -0,66833 | 0,261342 | 0,000568 | 0,024624 |
| Odc1              | 954,7727 | -0,67347 | 0,220649 | 0,000122 | 0,008943 |

|          |          |          |          |          |          |
|----------|----------|----------|----------|----------|----------|
| Kif21a   | 1304,89  | -0,67676 | 0,177688 | 8,38E-06 | 0,001091 |
| Ppp2r2d  | 1065,13  | -0,67833 | 0,189325 | 1,99E-05 | 0,002167 |
| Mapk1ip1 | 268,1825 | -0,68011 | 0,182102 | 1,12E-05 | 0,001358 |
| Parp16   | 618,9565 | -0,68041 | 0,302879 | 0,001036 | 0,037196 |
| Catsper2 | 81,30797 | -0,68082 | 0,309377 | 0,0012   | 0,040993 |
| Lgals8   | 3858,14  | -0,68175 | 0,128526 | 7,82E-09 | 3,26E-06 |
| Midn     | 949,37   | -0,68281 | 0,257974 | 0,000401 | 0,020118 |
| Ripk4    | 118,0489 | -0,68943 | 0,27289  | 0,000551 | 0,024215 |
| Rfx4     | 166,4253 | -0,6915  | 0,217488 | 8,1E-05  | 0,006713 |
| Arrdc4   | 366,8634 | -0,69258 | 0,245474 | 0,000242 | 0,01458  |
| Arsg     | 1110,235 | -0,6974  | 0,326578 | 0,001333 | 0,044691 |
| Npc1     | 2844,732 | -0,70057 | 0,242248 | 0,000192 | 0,0124   |
| Palmd    | 829,4878 | -0,72429 | 0,260675 | 0,000264 | 0,015435 |
| Amigo2   | 263,8222 | -0,73694 | 0,257518 | 0,000205 | 0,012878 |
| Hykk     | 2031,539 | -0,74017 | 0,286581 | 0,000438 | 0,021122 |
| Rsad1    | 353,725  | -0,74518 | 0,212583 | 2,45E-05 | 0,002607 |
| Grpel2   | 1558,669 | -0,75013 | 0,208791 | 1,74E-05 | 0,001949 |
| Grb14    | 1455,011 | -0,75152 | 0,172747 | 7,91E-07 | 0,000162 |
| Tnfrsf1b | 817,7566 | -0,75271 | 0,271027 | 0,000247 | 0,014678 |
| Pank1    | 6147,412 | -0,75305 | 0,217006 | 2,56E-05 | 0,002672 |
| Mycl     | 214,263  | -0,75373 | 0,284757 | 0,000366 | 0,019145 |
| Arl13b   | 164,5136 | -0,75616 | 0,301252 | 0,000521 | 0,023081 |
| ErbB3    | 2609,092 | -0,75668 | 0,192147 | 4,57E-06 | 0,000693 |
| Fads2    | 16996,98 | -0,76125 | 0,221907 | 3,13E-05 | 0,00315  |
| Tra2b    | 698,7221 | -0,76346 | 0,177081 | 8,91E-07 | 0,000181 |
| Wrnip1   | 1513,371 | -0,767   | 0,173099 | 5,26E-07 | 0,000113 |
| Fh1      | 6279,54  | -0,77196 | 0,364889 | 0,001302 | 0,04381  |
| Reps1    | 518,6072 | -0,77199 | 0,180617 | 1,09E-06 | 0,000209 |
| Josd2    | 853,5204 | -0,78004 | 0,251714 | 9,34E-05 | 0,007406 |
| Mat1a    | 117299,4 | -0,78093 | 0,228629 | 3,21E-05 | 0,003209 |
| Slc25a32 | 664,1264 | -0,78831 | 0,251168 | 8,28E-05 | 0,006826 |
| Tor1b    | 1659,597 | -0,79817 | 0,192062 | 1,77E-06 | 0,000321 |
| Tpm4     | 616,748  | -0,80572 | 0,308551 | 0,000398 | 0,020025 |
| Epha2    | 589,435  | -0,80847 | 0,354958 | 0,000866 | 0,033374 |
| Hsp90aa1 | 1795,178 | -0,8242  | 0,412269 | 0,001505 | 0,048509 |
| lfrd1    | 491,8712 | -0,83117 | 0,198533 | 1,53E-06 | 0,000282 |
| Glyctk   | 5443,891 | -0,8475  | 0,29786  | 0,000191 | 0,01237  |
| Tspan31  | 9213,027 | -0,85506 | 0,177196 | 7,29E-08 | 2,21E-05 |
| Pop1     | 106,3318 | -0,86217 | 0,33946  | 0,000439 | 0,021122 |
| Hmgn2    | 226,8144 | -0,86217 | 0,375944 | 0,000807 | 0,031385 |
| Slc22a5  | 971,5006 | -0,86283 | 0,321944 | 0,0003   | 0,01689  |
| Arhgef37 | 154,6442 | -0,86812 | 0,357774 | 0,000583 | 0,025097 |
| Cth      | 11311,29 | -0,86955 | 0,440426 | 0,00139  | 0,045865 |
| Hsd17b13 | 11873,09 | -0,87046 | 0,265646 | 5,07E-05 | 0,004564 |
| Hspa8    | 16381,2  | -0,87053 | 0,222815 | 4,71E-06 | 0,000708 |

|                   |          |          |          |          |          |
|-------------------|----------|----------|----------|----------|----------|
| Scamp1            | 1806,738 | -0,87755 | 0,157591 | 1,43E-09 | 8,04E-07 |
| Pnpla2            | 2011,608 | -0,88857 | 0,281757 | 7,35E-05 | 0,006193 |
| Cln8              | 809,6995 | -0,88987 | 0,209557 | 1,1E-06  | 0,000209 |
| Agxt              | 6331,707 | -0,90005 | 0,306112 | 0,000137 | 0,009854 |
| Tgfbr3l           | 55,71719 | -0,91384 | 0,382552 | 0,000638 | 0,026565 |
| Acacb             | 1593,952 | -0,91484 | 0,351468 | 0,000361 | 0,018928 |
| 4933431K14<br>Rik | 43,39567 | -0,91681 | 0,416777 | 0,00099  | 0,036167 |
| Slc25a22          | 6333,805 | -0,91785 | 0,330754 | 0,000221 | 0,013733 |
| Fbf1              | 291,5309 | -0,92374 | 0,357191 | 0,000374 | 0,019298 |
| Cystm1            | 265,0839 | -0,92542 | 0,353295 | 0,000344 | 0,018396 |
| Apbb3             | 432,6853 | -0,93259 | 0,310954 | 0,000115 | 0,008567 |
| Rab30             | 857,6835 | -0,93566 | 0,355309 | 0,000321 | 0,017673 |
| Angptl4           | 2985,981 | -0,9501  | 0,409427 | 0,000684 | 0,027942 |
| Pfkfb1            | 767,8397 | -0,95675 | 0,29008  | 4,3E-05  | 0,004071 |
| Setd7             | 145,2742 | -0,96679 | 0,374097 | 0,000369 | 0,019172 |
| Pck2              | 120,4039 | -0,96804 | 0,384751 | 0,000445 | 0,021164 |
| Plk3              | 2025,291 | -0,97075 | 0,42319  | 0,00073  | 0,028946 |
| Ppp1r9a           | 296,1184 | -0,97256 | 0,384083 | 0,000415 | 0,02035  |
| Rhpn2             | 523,8625 | -0,97422 | 0,365513 | 0,000293 | 0,016633 |
| Elovl2            | 12715,88 | -0,97746 | 0,217884 | 3,63E-07 | 8,53E-05 |
| Ppargc1a          | 250,2223 | -0,98317 | 0,336565 | 0,000141 | 0,010033 |
| Myh10             | 252,1581 | -0,98371 | 0,276793 | 1,72E-05 | 0,001949 |
| Atg16l2           | 423,2445 | -0,98775 | 0,387656 | 0,000406 | 0,020118 |
| Mppe1             | 425,312  | -0,98947 | 0,265379 | 9,08E-06 | 0,001152 |
| Tmtc2             | 263,9885 | -0,99504 | 0,293612 | 3,1E-05  | 0,00315  |
| Nceh1             | 1179,487 | -0,99759 | 0,264093 | 7,25E-06 | 0,000962 |
| Lgals4            | 960,3499 | -0,99939 | 0,28158  | 1,72E-05 | 0,001949 |
| Elovl6            | 1375,307 | -1,0043  | 0,373438 | 0,00027  | 0,015556 |
| Slc35e2           | 1482,959 | -1,00542 | 0,238321 | 1,21E-06 | 0,000226 |
| Armcx3            | 59,45779 | -1,01052 | 0,402112 | 0,000444 | 0,021164 |
| Slc20a1           | 1202,647 | -1,01254 | 0,332905 | 9,57E-05 | 0,007547 |
| Spred2            | 164,698  | -1,0164  | 0,322581 | 6,76E-05 | 0,005769 |
| Sgce              | 158,0384 | -1,02355 | 0,297118 | 2,55E-05 | 0,002672 |
| Elovl5            | 18388,37 | -1,02362 | 0,304122 | 3,13E-05 | 0,00315  |
| Apom              | 4688,781 | -1,03574 | 0,209059 | 3,52E-08 | 1,28E-05 |
| Hsf2bp            | 106,0766 | -1,03616 | 0,440429 | 0,000635 | 0,026537 |
| Abhd1             | 125,5966 | -1,03629 | 0,257626 | 2,73E-06 | 0,000453 |
| Fmo2              | 280,7485 | -1,04228 | 0,25571  | 2,14E-06 | 0,000376 |
| Gm30122           | 96,19339 | -1,04735 | 0,356608 | 0,000132 | 0,009585 |
| Chrna2            | 277,9384 | -1,05609 | 0,349592 | 9,96E-05 | 0,007722 |
| Slc25a47          | 22998,55 | -1,05985 | 0,195552 | 3,39E-09 | 1,7E-06  |
| Cpt1a             | 11910,49 | -1,07807 | 0,187433 | 4,35E-10 | 2,76E-07 |
| Slc25a30          | 983,5885 | -1,08895 | 0,366465 | 0,000113 | 0,008483 |
| Sorbs3            | 1135,035 | -1,10139 | 0,295764 | 9,08E-06 | 0,001152 |

|                   |          |          |          |          |          |
|-------------------|----------|----------|----------|----------|----------|
| Il17rb            | 291,9299 | -1,10632 | 0,2514   | 5,15E-07 | 0,000112 |
| Rapgef4           | 2567,169 | -1,10766 | 0,351236 | 6,2E-05  | 0,005414 |
| Mknk2             | 2769,843 | -1,12963 | 0,294921 | 5,62E-06 | 0,0008   |
| Zc3h12d           | 100,8982 | -1,1303  | 0,473803 | 0,000566 | 0,024624 |
| St3gal5           | 3198,145 | -1,13749 | 0,266786 | 9,76E-07 | 0,00019  |
| Gm32063           | 198,8228 | -1,14122 | 0,45534  | 0,000409 | 0,020212 |
| Hspb1             | 276,2499 | -1,14315 | 0,395539 | 0,000144 | 0,010095 |
| 9330159M07<br>Rik | 47,8234  | -1,14361 | 0,509844 | 0,000782 | 0,03088  |
| Plin2             | 20226,49 | -1,15518 | 0,215095 | 3,5E-09  | 1,7E-06  |
| Slc16a5           | 481,5501 | -1,15898 | 0,245713 | 1,15E-07 | 3,22E-05 |
| Rogdi             | 504,3495 | -1,17202 | 0,296245 | 3,39E-06 | 0,000531 |
| Itih5             | 242,2679 | -1,17209 | 0,327475 | 1,47E-05 | 0,001721 |
| Slc25a34          | 230,8459 | -1,18706 | 0,249202 | 8,9E-08  | 2,6E-05  |
| Tent5c            | 211,9448 | -1,18838 | 0,54801  | 0,000867 | 0,033374 |
| Map3k5            | 816,3852 | -1,19074 | 0,257949 | 1,81E-07 | 4,88E-05 |
| Tagln             | 213,4756 | -1,20343 | 0,46596  | 0,000324 | 0,017751 |
| Ten1              | 163,2439 | -1,20433 | 0,312207 | 5,15E-06 | 0,000759 |
| Enc1              | 346,6626 | -1,21973 | 0,376822 | 4,71E-05 | 0,004321 |
| Tacc2             | 614,4005 | -1,22901 | 0,323839 | 6,29E-06 | 0,000865 |
| C9orf72           | 501,3943 | -1,22923 | 0,312565 | 3,66E-06 | 0,000568 |
| Igfbp2            | 10998,02 | -1,23357 | 0,575717 | 0,000887 | 0,033771 |
| Odf3b             | 133,9352 | -1,25299 | 0,396101 | 6,02E-05 | 0,00531  |
| Btbd19            | 56,29831 | -1,25622 | 0,491784 | 0,000359 | 0,018928 |
| Irs2              | 534,8822 | -1,27567 | 0,357203 | 1,36E-05 | 0,001618 |
| Lad1              | 167,4237 | -1,27578 | 0,411666 | 7,33E-05 | 0,006193 |
| 1810055G02<br>Rik | 940,4041 | -1,2836  | 0,320317 | 2,63E-06 | 0,000441 |
| Pctp              | 4008,723 | -1,29354 | 0,282894 | 2,2E-07  | 5,56E-05 |
| Slco1a4           | 1419,517 | -1,31385 | 0,372144 | 1,61E-05 | 0,001848 |
| Sik1              | 745,8529 | -1,31548 | 0,519647 | 0,000341 | 0,018396 |
| Retreg1           | 2201,456 | -1,32409 | 0,234465 | 7,87E-10 | 4,59E-07 |
| Ccn2              | 534,8743 | -1,33252 | 0,539388 | 0,000416 | 0,02035  |
| Tra2a             | 728,7159 | -1,33354 | 0,219197 | 5,64E-11 | 4,62E-08 |
| Gm33447           | 24,77386 | -1,34049 | 0,587611 | 0,000702 | 0,028261 |
| Abhd2             | 4200,483 | -1,34416 | 0,208734 | 5,95E-12 | 7,89E-09 |
| Fgfr1             | 208,2057 | -1,37419 | 0,511548 | 0,000237 | 0,01436  |
| Frmd4b            | 1114,108 | -1,37439 | 0,360472 | 5,67E-06 | 0,0008   |
| Rdh16f2           | 2053,347 | -1,38444 | 0,365445 | 5,7E-06  | 0,0008   |
| Pgm3              | 676,5948 | -1,38498 | 0,205787 | 8,33E-13 | 1,35E-09 |
| Lpin2             | 7582,94  | -1,42009 | 0,279673 | 1,72E-08 | 6,42E-06 |
| Cdc42ep5          | 100,0224 | -1,44459 | 0,47046  | 7,69E-05 | 0,006407 |
| Slc2a5            | 220,8274 | -1,47887 | 0,506207 | 0,000119 | 0,008773 |
| Hhipl2            | 59,28946 | -1,48259 | 0,53936  | 0,000202 | 0,012798 |
| Cyp2d41-ps        | 58,95505 | -1,48319 | 0,330906 | 3,41E-07 | 8,29E-05 |

|                   |          |          |          |          |          |
|-------------------|----------|----------|----------|----------|----------|
| Slc25a27          | 35,14539 | -1,4934  | 0,500192 | 0,000108 | 0,008165 |
| Cyp4a32           | 759,6728 | -1,50319 | 0,281496 | 4,19E-09 | 1,97E-06 |
| Cidec             | 1961,58  | -1,50659 | 0,341869 | 4,49E-07 | 9,93E-05 |
| Serpib6b          | 169,0611 | -1,50906 | 0,56221  | 0,000235 | 0,014301 |
| Gstp2             | 166,7451 | -1,56769 | 0,665727 | 0,000511 | 0,022973 |
| Nlrp12            | 2506,553 | -1,65427 | 0,318488 | 8,95E-09 | 3,63E-06 |
| Gm34654           | 97,99884 | -1,65497 | 0,48337  | 2,28E-05 | 0,002447 |
| Cables1           | 57,6669  | -1,66498 | 0,355692 | 1,36E-07 | 3,75E-05 |
| Ncmap             | 31,2672  | -1,67374 | 0,532794 | 6,47E-05 | 0,005583 |
| Lamb3             | 267,927  | -1,69611 | 0,264987 | 7,54E-12 | 9,16E-09 |
| Sel1l3            | 412,7181 | -1,69969 | 0,350642 | 5,01E-08 | 1,68E-05 |
| Gm35696           | 128,115  | -1,72751 | 0,65831  | 0,000254 | 0,015019 |
| Tbc1d8            | 451,6229 | -1,73702 | 0,389115 | 3,61E-07 | 8,53E-05 |
| Gys2              | 5041,325 | -1,75131 | 0,31744  | 1,54E-09 | 8,3E-07  |
| Gm15663           | 13,55922 | -1,75654 | 0,689756 | 0,000382 | 0,019494 |
| Dusp3             | 990,497  | -1,84107 | 0,127817 | 2,33E-48 | 3,39E-44 |
| Cntrl             | 739,5584 | -1,85414 | 0,246881 | 2,68E-15 | 7,81E-12 |
| Gm44509           | 16,61769 | -1,85989 | 0,681087 | 0,000344 | 0,018396 |
| Gm32540           | 54,83959 | -1,87931 | 0,540475 | 1,82E-05 | 0,002013 |
| Gpcpd1            | 2624,021 | -1,92038 | 0,511584 | 6,41E-06 | 0,000873 |
| Gm33543           | 488,3092 | -1,92637 | 0,547484 | 1,55E-05 | 0,001792 |
| 2010003K11<br>Rik | 1559,352 | -1,92959 | 0,410739 | 1,09E-07 | 3,11E-05 |
| Tbc1d30           | 195,2099 | -1,94049 | 0,400325 | 5,23E-08 | 1,7E-05  |
| Ackr2             | 83,12597 | -2,04696 | 0,394511 | 9,33E-09 | 3,68E-06 |
| BC030867          | 16,86352 | -2,07126 | 0,621371 | 3,56E-05 | 0,003481 |
| Nipal1            | 234,386  | -2,10188 | 0,639891 | 3,37E-05 | 0,003345 |
| Gm34667           | 178,3093 | -2,15056 | 0,234967 | 2,9E-21  | 2,11E-17 |
| Maff              | 147,1549 | -2,24786 | 0,458449 | 3,87E-08 | 1,38E-05 |
| 3930402G23<br>Rik | 126,417  | -2,28048 | 0,465975 | 4,07E-08 | 1,41E-05 |
| Zfp9              | 49,45074 | -2,30592 | 0,381426 | 8,05E-11 | 5,59E-08 |
| Apoa4             | 56978,27 | -2,30783 | 0,44108  | 6,89E-09 | 3,05E-06 |
| D930007J09<br>Rik | 29,41297 | -2,31383 | 0,454624 | 1,7E-08  | 6,42E-06 |
| Adgrf1            | 23,14085 | -2,42072 | 0,604582 | 3,04E-06 | 0,000486 |
| Camk2b            | 286,5014 | -2,4308  | 0,333998 | 1,6E-14  | 3,88E-11 |
| Agap2             | 100,263  | -2,70219 | 0,640322 | 9,29E-07 | 0,000184 |
| 9430037G07<br>Rik | 96,81524 | -2,82331 | 0,444986 | 1E-11    | 1,08E-08 |
| Fabp5             | 475,0823 | -2,86533 | 0,548276 | 7,47E-09 | 3,2E-06  |
| Bcl2l14           | 32,03478 | -3,02055 | 0,698622 | 7,75E-07 | 0,000161 |
| Hspa1b            | 175,0326 | -3,02118 | 0,638794 | 8,61E-08 | 2,56E-05 |
| Gm45044           | 24,17073 | -3,05581 | 0,761821 | 2,2E-06  | 0,000382 |
| Trpm5             | 10,14297 | -3,08019 | 0,775571 | 4,55E-06 | 0,000693 |

|                   |          |          |          |          |          |
|-------------------|----------|----------|----------|----------|----------|
| Cgref1            | 168,4962 | -3,09017 | 0,510112 | 6,03E-11 | 4,62E-08 |
| B930025P03<br>Rik | 180,8033 | -3,56638 | 0,415451 | 4,58E-19 | 2,23E-15 |
| Cntnap1           | 275,9808 | -3,73909 | 0,54044  | 2,05E-13 | 3,74E-10 |
| 2310034O05<br>Rik | 19,39748 | -4,20239 | 0,977043 | 3,32E-06 | 0,000527 |
| Lepr              | 350,5264 | -4,36665 | 0,521096 | 2,44E-18 | 8,88E-15 |
| Ifi208            | 15,05129 | -6,84088 | 2,590828 | 4,21E-07 | 9,44E-05 |
| Gm43305           | 45,85173 | -9,61292 | 2,946223 | 2,98E-11 | 2,72E-08 |

**Supplementary table S4.** Differentially expressed genes between WT and DUSP3-KO mice under HFD.

| <b>Gene name</b> | <b>Base Mean</b> | <b>log2 Fold Change</b> | <b>lfcSE</b> | <b>pvalue</b> | <b>padj</b> |
|------------------|------------------|-------------------------|--------------|---------------|-------------|
| BC018473         | 61,086678<br>6   | 10,91695                | 2,834897     | 1,85E-15      | 9,62E-12    |
| Gm28438          | 10,468340<br>75  | 6,566642                | 2,394893     | 5,8E-07       | 0,000377    |
| Myo15b           | 105,31423<br>47  | 4,697107                | 0,71147      | 1,89E-12      | 5,88E-09    |
| Gm3776           | 49,598320<br>18  | 4,486473                | 0,84043      | 4,24E-09      | 6,62E-06    |
| Lrtm2            | 19,126040<br>62  | 4,111087                | 1,193985     | 2,25E-05      | 0,00746     |
| Cbr3             | 234,20005<br>69  | 3,905198                | 1,109752     | 1,33E-05      | 0,005104    |
| Serpina5         | 8,9582314<br>92  | 3,430901                | 0,849846     | 3,76E-06      | 0,001894    |
| Fosb             | 50,298683<br>66  | 3,41422                 | 1,059139     | 3,86E-05      | 0,010859    |
| Elovl7           | 42,505805<br>92  | 3,330859                | 0,988412     | 2,45E-05      | 0,007812    |
| Gstm3            | 2249,6935<br>28  | 3,173827                | 0,752752     | 9,56E-07      | 0,000597    |
| Grip1            | 6,7944876<br>76  | 2,840346                | 0,887245     | 8,29E-05      | 0,018086    |
| Fam83a           | 131,89848<br>04  | 2,718401                | 0,432461     | 1,54E-11      | 3,43E-08    |
| Folh1            | 13,112251<br>6   | 2,585242                | 0,689632     | 7,96E-06      | 0,003548    |
| Mogat2           | 17,117088<br>82  | 2,547664                | 0,885596     | 0,000126      | 0,021689    |
| Adgrv1           | 430,77868<br>07  | 2,508338                | 0,521868     | 6,29E-08      | 4,67E-05    |
| Sema3b           | 64,700721<br>08  | 2,45375                 | 0,358935     | 4,32E-13      | 1,68E-09    |
| Bmp8b            | 10,523476<br>43  | 2,313269                | 0,879665     | 0,000288      | 0,039826    |
| Ankrd42          | 17,731083<br>32  | 1,978109                | 0,548827     | 1,47E-05      | 0,005477    |
| Slc39a4          | 430,06109<br>57  | 1,937077                | 0,567166     | 2,21E-05      | 0,00746     |
| Rragd            | 171,69942<br>6   | 1,911168                | 0,567367     | 2,66E-05      | 0,008154    |
| Cidec            | 1961,5797<br>18  | 1,886692                | 0,337085     | 7,72E-10      | 1,34E-06    |



|            |                 |          |          |          |          |
|------------|-----------------|----------|----------|----------|----------|
| Mmp12      | 179,28555<br>32 | 1,71705  | 0,584111 | 0,000108 | 0,02001  |
| Sntg1      | 13,360012<br>99 | 1,659308 | 0,654708 | 0,000383 | 0,048981 |
| Ptch2      | 40,364628<br>87 | 1,605692 | 0,524674 | 7,68E-05 | 0,017217 |
| Srxn1      | 2149,9322<br>99 | 1,494234 | 0,564122 | 0,000243 | 0,035095 |
| Ephb2      | 144,37247<br>14 | 1,480255 | 0,593346 | 0,000372 | 0,048845 |
| Mirt2      | 34,917134<br>26 | 1,466158 | 0,544312 | 0,000223 | 0,033777 |
| St6galnac2 | 49,530663<br>54 | 1,438506 | 0,482104 | 9,86E-05 | 0,019487 |
| Nqo1       | 393,98714<br>05 | 1,429722 | 0,529037 | 0,000212 | 0,032776 |
| Treh       | 101,53179<br>18 | 1,411001 | 0,351654 | 2,44E-06 | 0,001271 |
| Fndc10     | 23,518412<br>93 | 1,407811 | 0,53685  | 0,000288 | 0,039826 |
| Sh3pxd2b   | 71,729720<br>36 | 1,377139 | 0,547466 | 0,00035  | 0,046748 |
| Unc5b      | 185,61809<br>8  | 1,318643 | 0,416447 | 5,43E-05 | 0,013885 |
| Casp12     | 143,01123<br>33 | 1,300961 | 0,522697 | 0,000381 | 0,048981 |
| Fgfr1      | 208,20572<br>71 | 1,300426 | 0,525199 | 0,000383 | 0,048981 |
| Tymp       | 860,30806<br>75 | 1,296457 | 0,266077 | 4,75E-08 | 3,71E-05 |
| Lad1       | 167,42365<br>4  | 1,24288  | 0,401378 | 6,84E-05 | 0,016942 |
| Osbpl3     | 596,48519<br>25 | 1,234203 | 0,383423 | 4,64E-05 | 0,012486 |
| Mapt       | 222,59893<br>08 | 1,223012 | 0,303906 | 2,41E-06 | 0,001271 |
| Cyp2d12    | 28,909593<br>19 | 1,180283 | 0,439383 | 0,000236 | 0,03486  |
| Arhgef16   | 105,62109<br>19 | 1,168274 | 0,231698 | 2,04E-08 | 1,99E-05 |
| Gal3st1    | 129,51043<br>05 | 1,125789 | 0,366952 | 7,72E-05 | 0,017217 |
| Gstm2      | 1512,5254<br>38 | 1,123092 | 0,365843 | 7,66E-05 | 0,017217 |
| Pgd        | 1143,9958<br>45 | 1,047009 | 0,39196  | 0,000245 | 0,035096 |
| Usp20      | 306,56114<br>25 | 1,015559 | 0,240859 | 1,06E-06 | 0,000638 |

|           |                 |          |          |          |          |
|-----------|-----------------|----------|----------|----------|----------|
| Wdfy1     | 442,65656<br>06 | 0,984349 | 0,191162 | 1,2E-08  | 1,57E-05 |
| Ctps      | 118,79081<br>49 | 0,980257 | 0,26375  | 8,36E-06 | 0,003548 |
| Myh10     | 252,15805<br>76 | 0,945156 | 0,275003 | 2,3E-05  | 0,007465 |
| Nphp1     | 69,949036<br>93 | 0,911811 | 0,336588 | 0,000233 | 0,03486  |
| Gnai1     | 300,97087<br>44 | 0,865652 | 0,285245 | 8,79E-05 | 0,018796 |
| Tgfbr2    | 696,37303<br>6  | 0,865574 | 0,152244 | 6,49E-10 | 1,27E-06 |
| Lama5     | 108,74081<br>8  | 0,843579 | 0,328636 | 0,000343 | 0,046428 |
| Rcan1     | 472,80765<br>74 | 0,797055 | 0,168434 | 9,96E-08 | 6,76E-05 |
| Tsen54    | 176,56852<br>37 | 0,676003 | 0,226886 | 0,000117 | 0,020727 |
| Fam53b    | 236,02931<br>08 | 0,664735 | 0,205909 | 5,21E-05 | 0,01378  |
| Vat1      | 925,72031<br>3  | 0,644767 | 0,225974 | 0,00017  | 0,027212 |
| Rab3d     | 353,80769<br>59 | 0,638777 | 0,187846 | 2,93E-05 | 0,008634 |
| Eno1      | 4597,5159<br>43 | 0,624823 | 0,150344 | 1,57E-06 | 0,000873 |
| Gbe1      | 2579,1638<br>15 | 0,622656 | 0,217869 | 0,000171 | 0,027212 |
| Acer2     | 341,92483<br>83 | 0,619468 | 0,203208 | 9,48E-05 | 0,019356 |
| Ank3      | 287,89386<br>68 | 0,594505 | 0,19547  | 9,97E-05 | 0,019487 |
| Nr6a1     | 203,33741<br>5  | -0,62651 | 0,241399 | 0,000345 | 0,046428 |
| Nlrp6     | 3006,4200<br>7  | -0,65521 | 0,187239 | 1,89E-05 | 0,00659  |
| Serpina1a | 34149,695<br>9  | -0,65856 | 0,2546   | 0,000369 | 0,048845 |
| Nhej1     | 100,53110<br>91 | -0,66069 | 0,210608 | 7,07E-05 | 0,016967 |
| Ero1lb    | 965,59822<br>63 | -0,67008 | 0,223839 | 0,000107 | 0,02001  |
| Tcp11l2   | 746,39929<br>55 | -0,70791 | 0,142682 | 3,33E-08 | 2,89E-05 |
| Col5a3    | 1030,6526<br>24 | -0,73691 | 0,292887 | 0,000386 | 0,048981 |
| Zfp707    | 784,58921<br>98 | -0,75992 | 0,211995 | 1,34E-05 | 0,005104 |

|                   |                 |          |          |          |          |
|-------------------|-----------------|----------|----------|----------|----------|
| Mir22hg           | 1456,4722<br>47 | -0,78534 | 0,278729 | 0,000171 | 0,027212 |
| Apom              | 4688,7812<br>63 | -0,83062 | 0,214716 | 4,6E-06  | 0,002241 |
| Hacl1             | 1241,4311<br>64 | -0,91579 | 0,307814 | 0,000105 | 0,019944 |
| Irgm2             | 1175,7438<br>14 | -0,9383  | 0,34331  | 0,000206 | 0,032198 |
| 5830473C10<br>Rik | 892,75271<br>28 | -0,98148 | 0,323483 | 8,34E-05 | 0,018086 |
| Smim1             | 143,02685<br>19 | -1,06118 | 0,354638 | 9,55E-05 | 0,019356 |
| Dusp3             | 990,49695<br>09 | -1,10314 | 0,127462 | 2,44E-19 | 3,81E-15 |
| 1300014J16<br>Rik | 35,105370<br>55 | -1,12941 | 0,441115 | 0,000327 | 0,044803 |
| Gm34667           | 178,30927<br>12 | -1,14874 | 0,242107 | 9,06E-08 | 6,42E-05 |
| Mettl23           | 602,44341<br>89 | -1,17439 | 0,393544 | 9,46E-05 | 0,019356 |
| Cadm4             | 148,09192<br>77 | -1,18315 | 0,349414 | 2,6E-05  | 0,0081   |
| Sdf2l1            | 381,30507<br>61 | -1,22285 | 0,412523 | 9,99E-05 | 0,019487 |
| Avpr1a            | 412,77729<br>09 | -1,29498 | 0,417731 | 6,53E-05 | 0,016445 |
| Nfil3             | 714,52824<br>73 | -1,37755 | 0,268921 | 1,34E-08 | 1,61E-05 |
| mt-Tm             | 157,87063<br>74 | -1,48941 | 0,46462  | 4,51E-05 | 0,012358 |
| Hsd11b1           | 9931,8821<br>59 | -1,48969 | 0,406618 | 8,41E-06 | 0,003548 |
| Slc22a7           | 385,37878<br>63 | -1,5375  | 0,444584 | 1,9E-05  | 0,00659  |
| Derl3             | 69,443414<br>82 | -1,58048 | 0,576    | 0,000181 | 0,028611 |
| Gm12909           | 276,37024<br>75 | -1,60257 | 0,317735 | 1,9E-08  | 1,97E-05 |
| Msmg              | 45,499752<br>76 | -1,95994 | 0,66764  | 0,000103 | 0,019853 |
| Susd4             | 546,25350<br>54 | -2,09902 | 0,4049   | 8,93E-09 | 1,27E-05 |
| Cyp2c37           | 7354,8007<br>64 | -2,17959 | 0,531419 | 1,47E-06 | 0,000848 |
| Gm48878           | 24,426942<br>66 | -2,24937 | 0,580645 | 4,74E-06 | 0,002241 |
| Rdh16f2           | 2053,3466<br>24 | -2,65817 | 0,349483 | 1,45E-15 | 9,62E-12 |

|         |                 |          |          |          |          |
|---------|-----------------|----------|----------|----------|----------|
| Snord13 | 28,532624<br>05 | -2,72045 | 0,551463 | 3,68E-08 | 3,03E-05 |
| lfi208  | 15,051293<br>54 | -3,58411 | 0,694562 | 1,79E-08 | 1,97E-05 |
| Gm43305 | 45,851731<br>54 | -10,114  | 3,002079 | 3,15E-12 | 8,2E-09  |

## Supplementary legends to figures

**Figure S1.** Concentrations of HDL (a) and LDL (b) the sera of DUSP3-KO and WT mice. Each dot represents one mouse. Mean  $\pm$  SD values for all mice are shown. \*\*P < 0.01; \*\*\*P < 0.001. (c) Representatives immunohistochemistry images illustrating the histological features that served for SAF scoring.

**Figure S2.** : (a-b) Representative images of livers from DEN-challenged DUSP3-KO and WT mice fed CD or HFD 24 weeks (a) and 32 weeks (b) post-DEN injection. (c) NAS score 24 and 32 weeks post-DEN injection. (d-h) Concentrations of T-CHO, LDL/HDL ratio and TG in the sera of mice 24 and 32 weeks post-DEN injection. Each dot represents one mouse. Mean  $\pm$  SD values for all mice are shown. \*P < 0.05; \*\*P < 0.01; \*\*\*P < 0.001.

**Figure S3.** Concentrations AST (a) and ALT (b) in the sera of DEN challenged DUSP3-KO and WT mice fed CD or HFD after 24 and 32 weeks post-DEN injection. Each dot represents one mouse. Mean  $\pm$  SD values for all mice are shown. \*P > 0.05; \*\*P < 0.01.

**Figure S4.** Heatmap representing differentially expressed genes between WT and DUSP3-KO mice under CD (a) and under HFD (b). Complete list of genes is in the supplementary tables S3 and S4.

**Figure S5.** Expression of selected genes validated by qRT-PCR. RNA expression for each target gene was normalized to that of ribosomal protein S9 (RSP9). Results are expressed as mean  $\pm$  SD. n=3 samples per condition.

## Supplementary references

1. Dobin A, Davis CA, Schlesinger F, Drenkow J, Zaleski C, Jha S, et al. STAR: Ultrafast universal RNA-seq aligner. *Bioinformatics*. 2013;
2. Love MI, Huber W, Anders S. Moderated estimation of fold change and dispersion for RNA-seq data with DESeq2. *Genome Biol*. 2014;
3. Zhu A, Ibrahim JG, Love MI. Heavy-Tailed prior distributions for sequence count data: Removing the noise and preserving large differences. *Bioinformatics*. 2019;
4. Bahri MA, Plenevaux A, Warnock G, Luxen A, Seret A. NEMA NU4-2008 image quality performance report for the micropet focus 120 and for various transmission and reconstruction methods. *J. Nucl. Med*. 2009;
5. Bretin F, Warnock G, Bahri MA, Aerts J, Mestdagh N, Buchanan T, et al. Preclinical radiation dosimetry for the novel SV2A radiotracer [18F]UCB-H. *EJNMMI Res*. [Internet]. 2013;3:35. Available from: <http://ejnmires.springeropen.com/articles/10.1186/2191-219X-3-35>

Figure S1

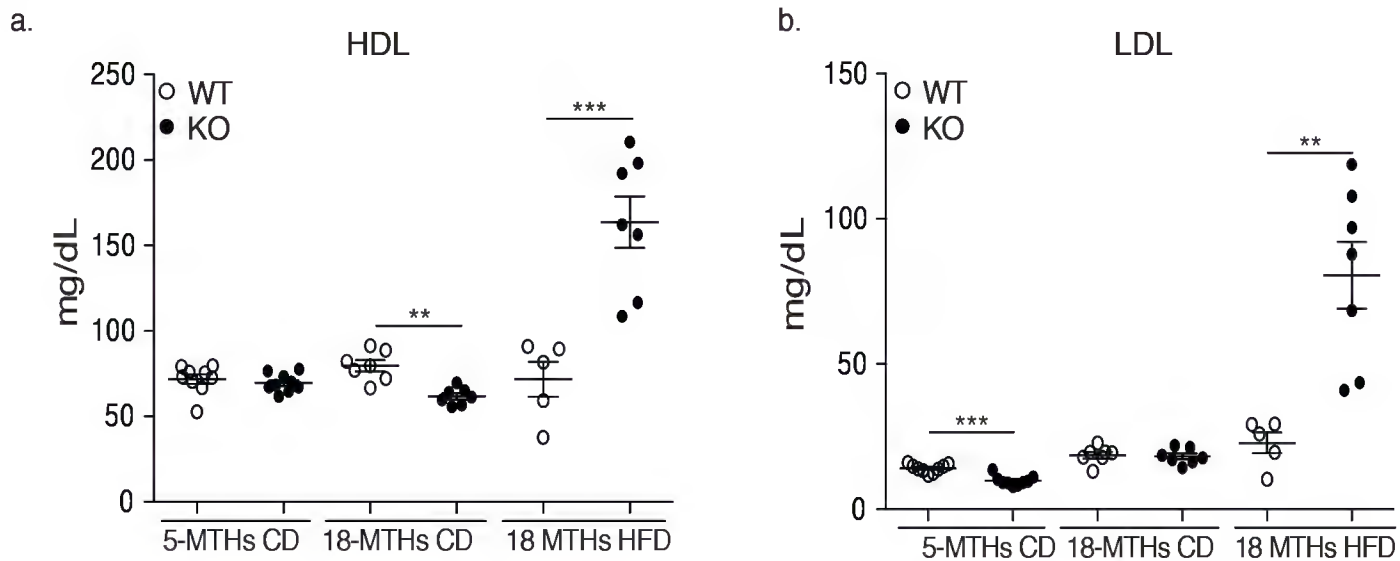

c.

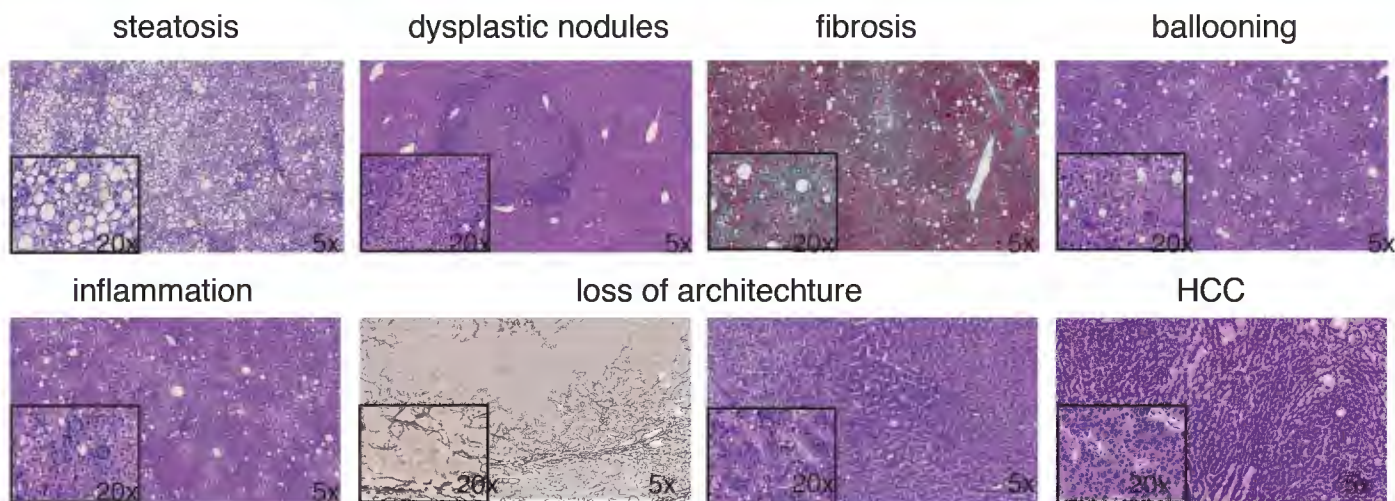



Figure S2

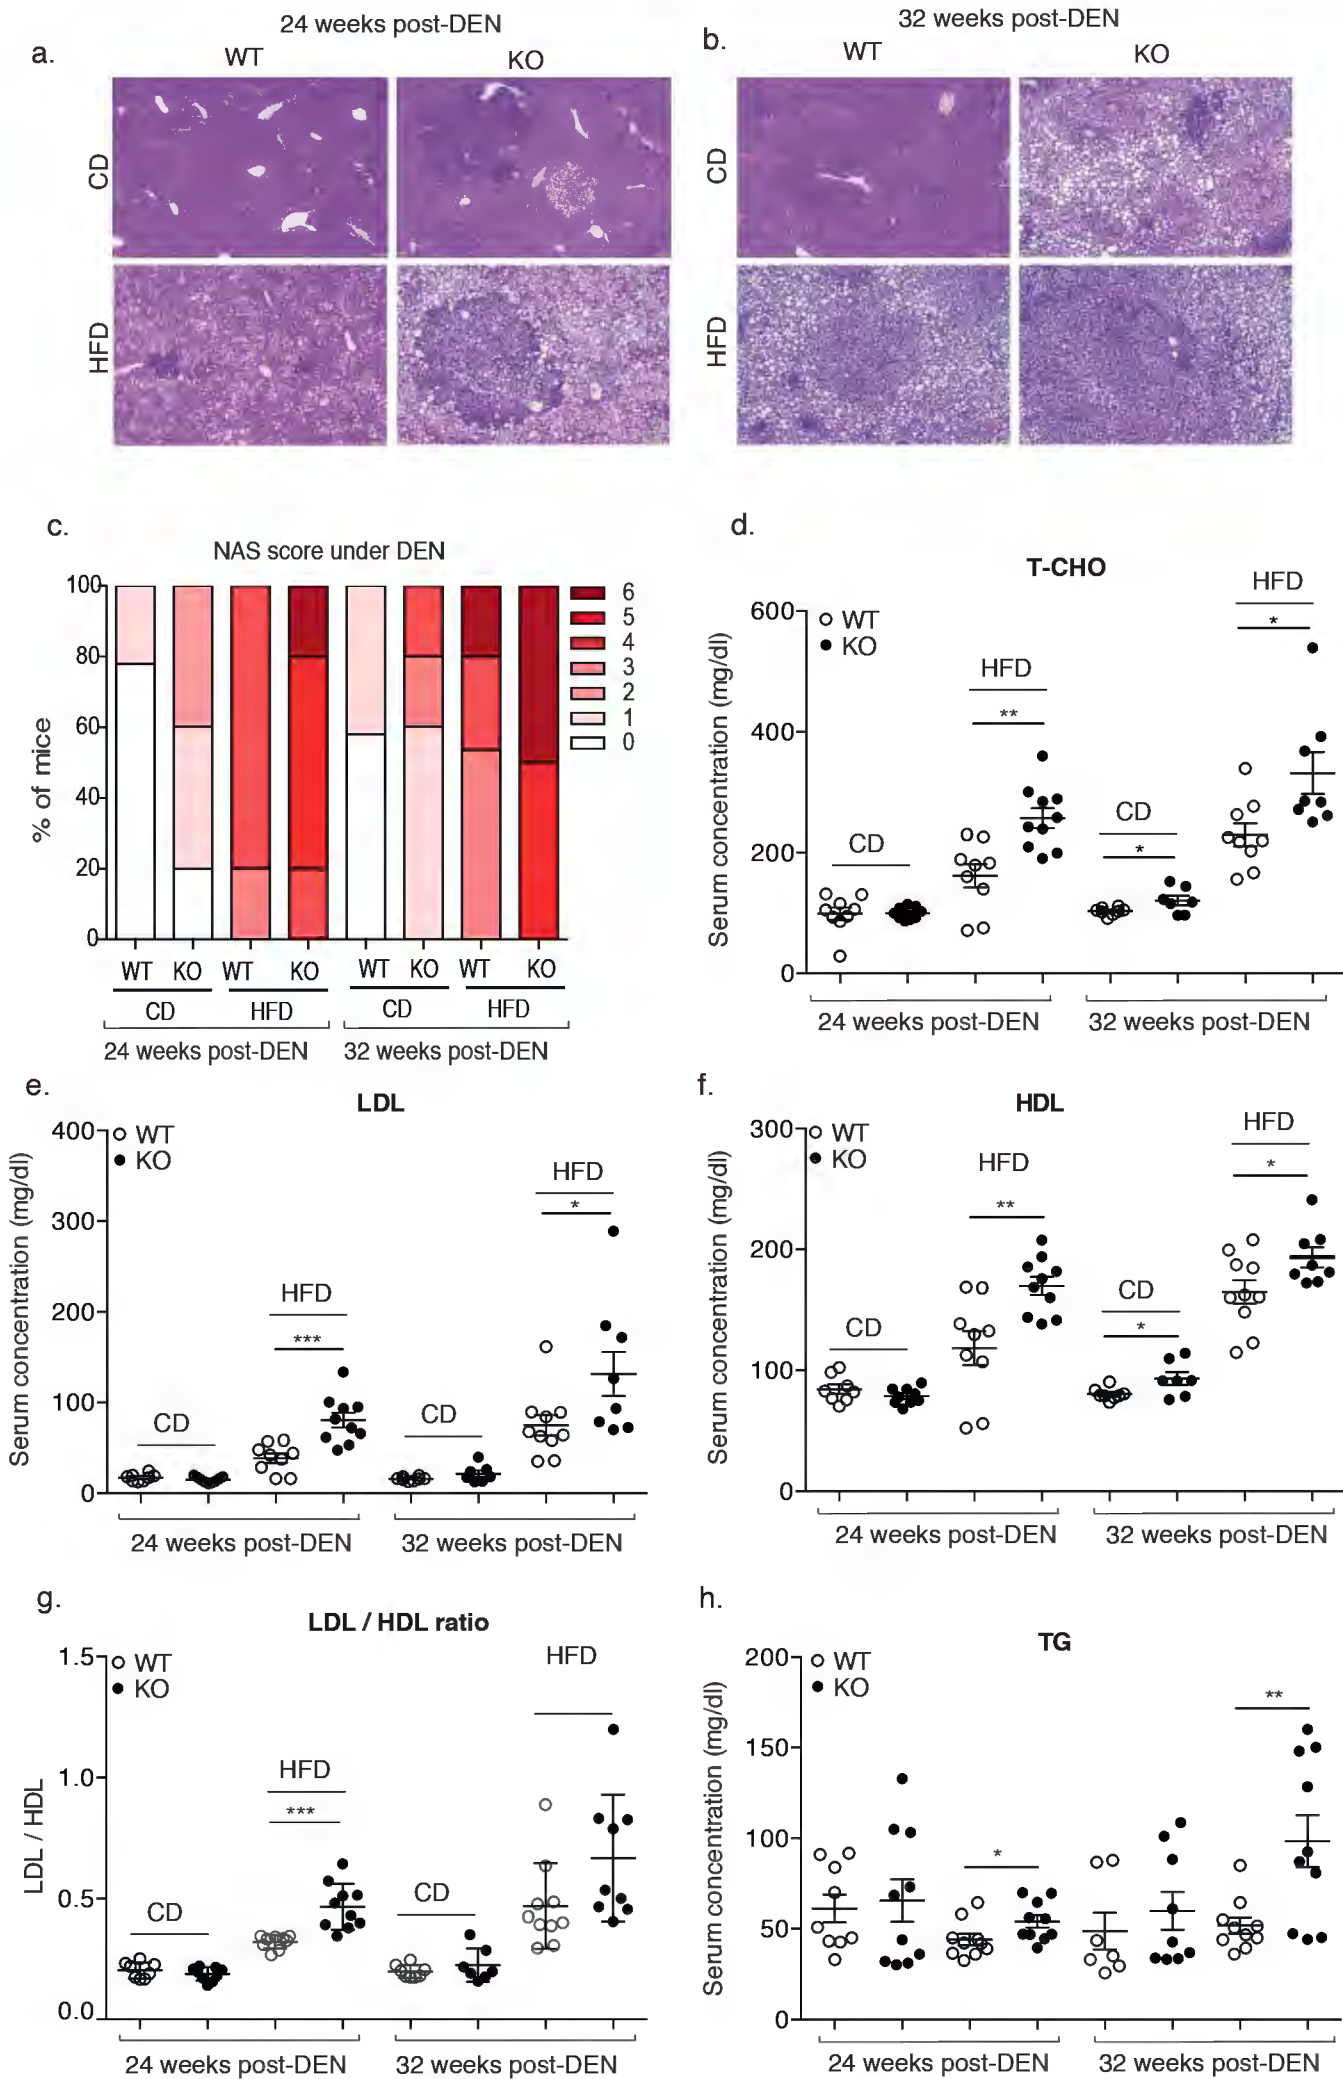

Figure S3

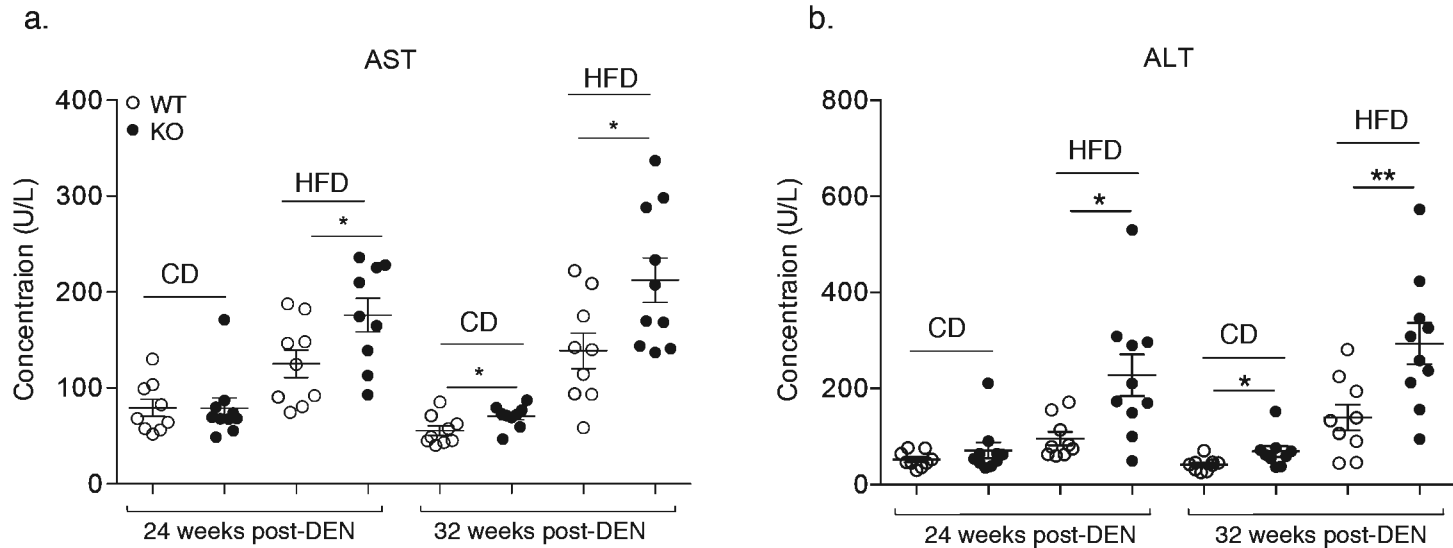

Figure S4

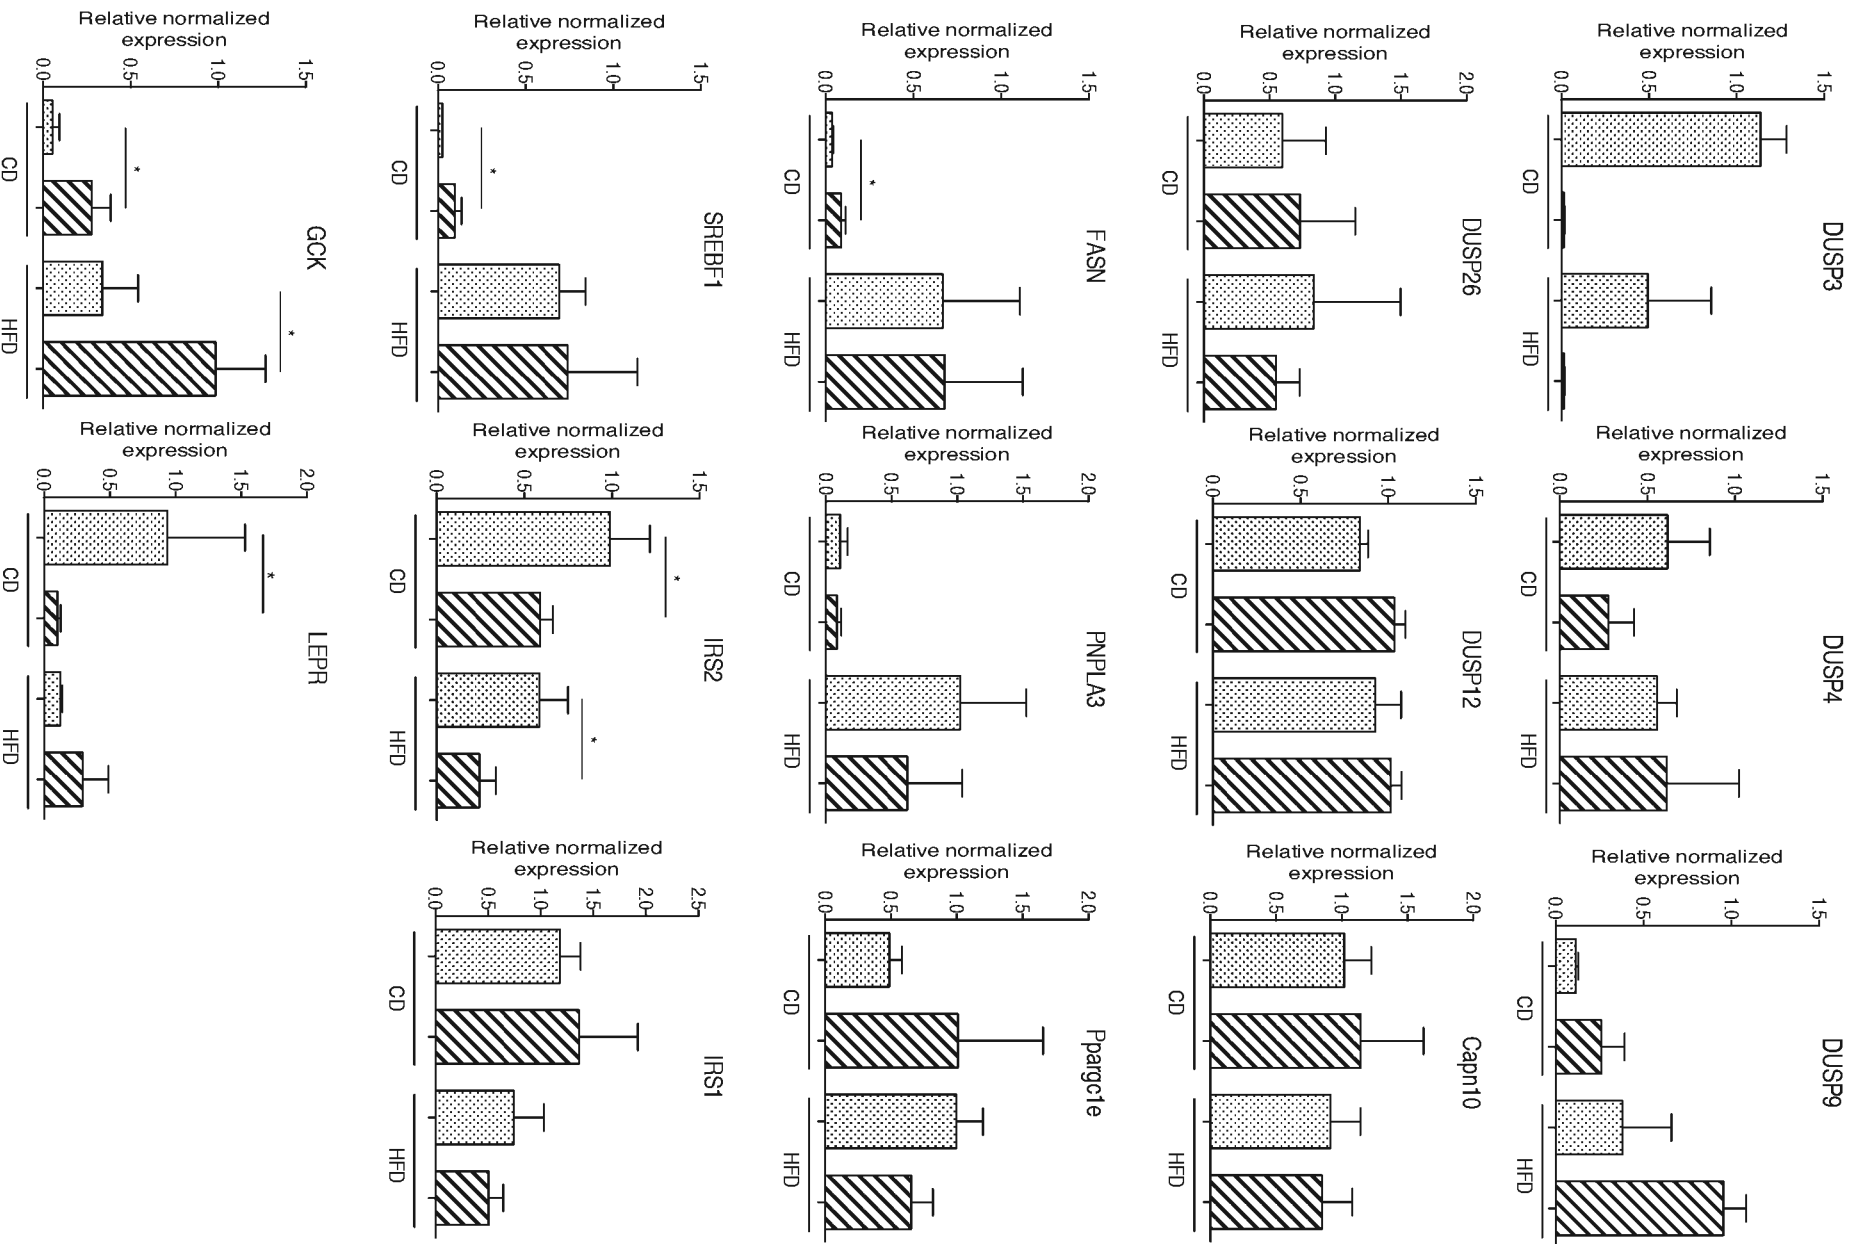

Figure S5

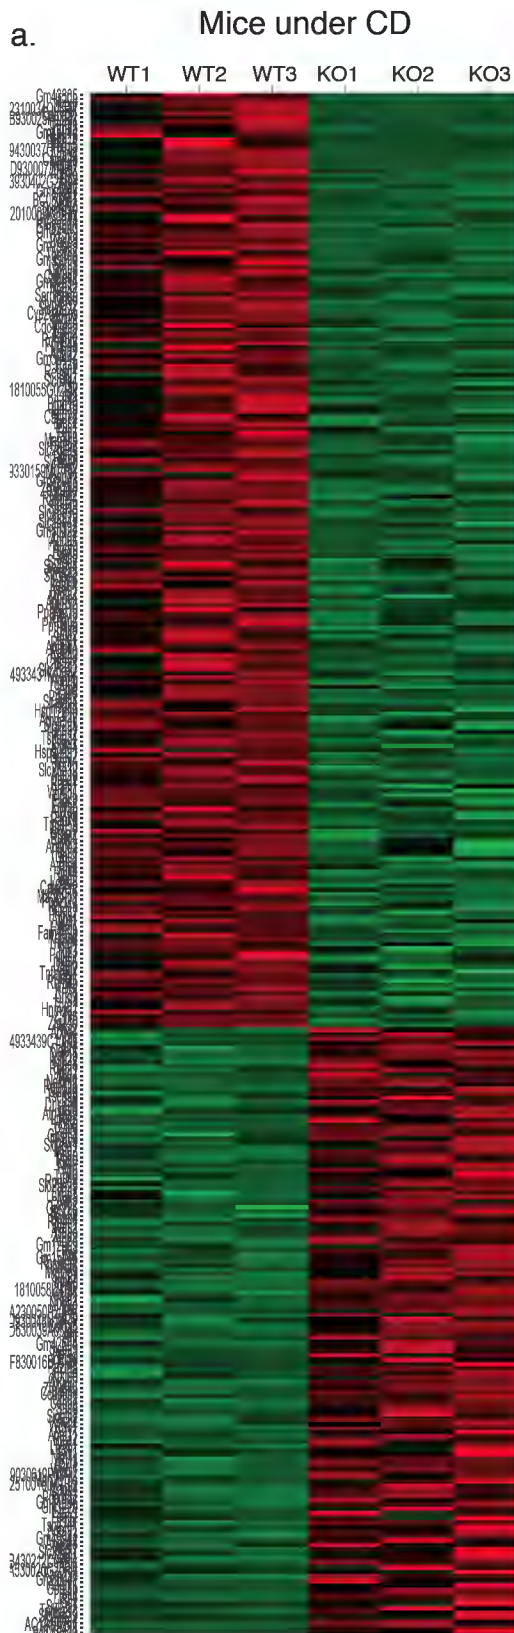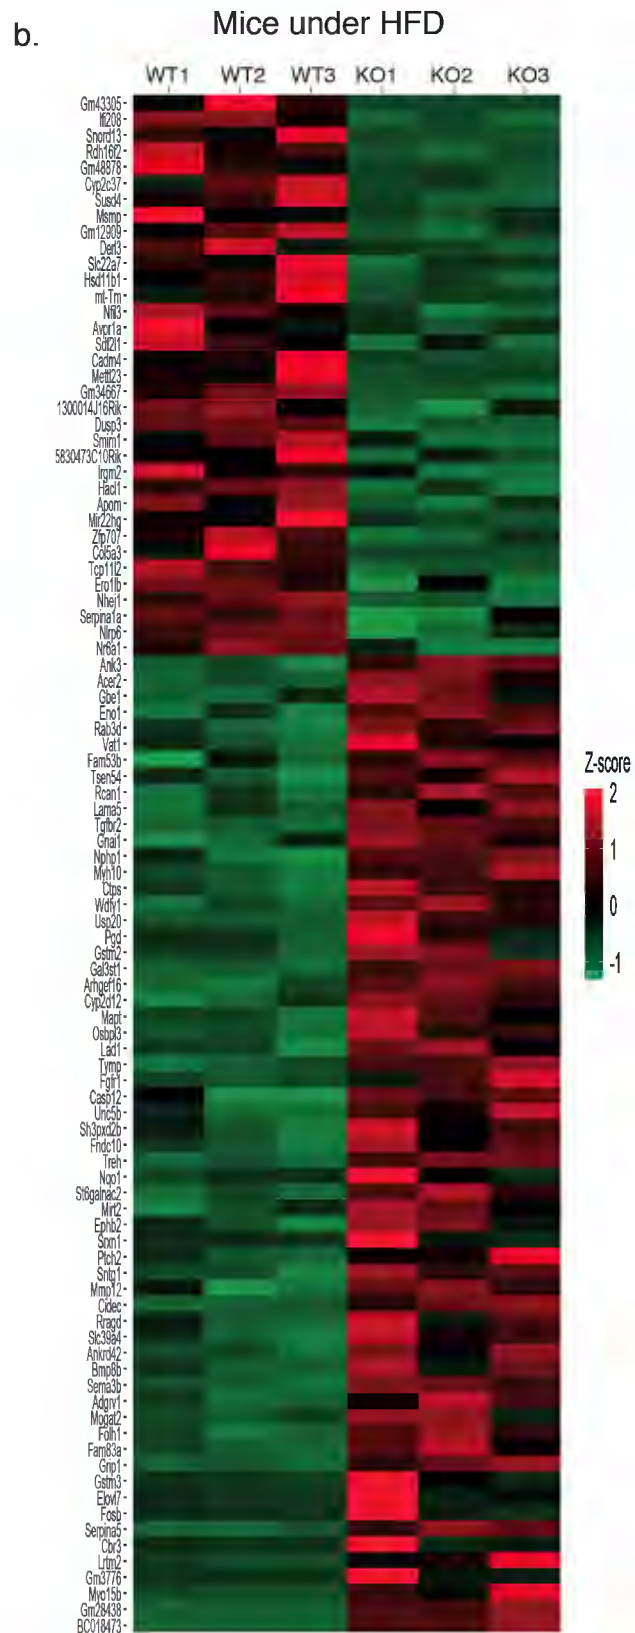

Supplement: 41598_2021_85089_MOESM1_ESM.pdf [file 41598_2021_85089_MOESM1_ESM.pdf]
